# Supplementary material for: Induced Pluripotent Stem Cell-Derived Neural Stem Cell Therapy Enhances Recovery in an Ischemic Stroke Pig Model
Source: PubMed Central journal article supplement (PMC5577218; doi:10.1038/s41598-017-10406-x), 2017-08-30
Supplement: 41598_2017_10406_MOESM1_ESM.pdf [file 41598_2017_10406_MOESM1_ESM.pdf]

## 25 **Supplementary Methods**

26

### 27 **Human Induced Pluripotent Stem Cell-Derived Neural Stem Cells (iNSC)**

28 ***iNSC culture*** iNSCs were maintained on Matrigel-coated (BD Bioscience) tissue culture plates  
29 and maintained in neural stem cell media composed of Neurobasal medium (Thermo Fisher  
30 Scientific), 2% B-27 Supplement (Thermo Fisher Scientific), 1% non-essential amino acids (Life  
31 Technologies) 2 mM L-glutamine (Life Technologies), 1% penicillin/streptomycin (Invitrogen),  
32 and 20 ng/mL bFGF (R&D Systems). A complete media change was performed every other day.  
33 When iNSCs reached confluence, cells were enzymatically passaged using Accutase (Innovative  
34 Cell Technologies) and removed from the dish using a cell scraper. After passaging, the cells  
35 were re-plated at a ratio of 1:4.

36 ***iNSC differentiation*** iNSCs underwent spontaneous differentiation by culturing cells in neural  
37 stem cell media without bFGF for 2 and 4 weeks. Differentiation cultures were maintained on  
38 Matrigel-coated glass four-well chamber slides. Differentiated iNSC cultures underwent  
39 immunocytochemistry for mature neural cell marker detection.

40 ***iNSC flow cytometry and immunocytochemistry*** For both flow cytometry and  
41 immunocytochemistry, iNSCs were fixed with 4% paraformaldehyde (PFA; Electron  
42 Microscopy Sciences) for 15 minutes. Cells were permeabilized in blocking solution containing  
43 0.1% Triton X-100, 1% Polyvinylpyrrolidone (PVP; Sigma-Aldrich), and 3% serum. Primary  
44 antibodies were diluted in blocking solution and incubated for one hour at room temperature.  
45 Primary antibodies used were Nestin (Neuromics, 1:200), Sox1 (R&D Systems, 1:20), Tuj1  
46 (Neuromics, 1:200), MAP2 (Millipore, 1:500), GFAP (Abcam, 1:500), and Olig2 (Genetex,  
47 1:250). Primary antibodies were detected using a fluorescently conjugated secondary antibody,  
48 Alexa Fluor (Invitrogen; 1:1000) and incubated for one hour at room temperature before

49 washing. For immunocytochemistry, stained slides were mounted with Prolong Gold with DAPI  
50 (Life Technologies) and imaged on an IX81 microscope with Disc-Spinning Unit (Olympus,  
51 Inc.) using Slide Book Software (Intelligent Imaging Innovations). For flow cytometry, cells  
52 were analyzed using a CyAn ADP flow cytometer (Beckman Coulter, Hialeah, Florida) and  
53 FlowJo Cytometry analysis software (Tree Star).

54

### 55 **Labeling of iNSCs**

56 iNSCs were labeled with 1,1'-dioctadecyl-3,3,3',3'-tetramethylindotricarbocyanine iodide (DiR)  
57 at a concentration of 2  $\mu\text{g}/\text{mL}$  diluted in phosphate buffered saline (PBS). After incubation at  
58 37°C for 5 minutes, iNSCs were washed twice with PBS via centrifugation at 1500rpm. Cells  
59 were then resuspended in PBS at a final concentration 150,000 cells/ $\mu\text{L}$  for transplantation.

60

### 61 **Pig Stroke Model**

62 *Animal Preparation* Pigs were individually housed and fed a nutritionally complete diet. Room  
63 temperature was maintained at 26°C with a 12 h light/dark cycle. All animals were administered  
64 antibiotics daily for 3 days prior to surgery (Naxcel<sup>®</sup>; 4mg/kg IM). Pre-induction analgesia and  
65 sedation was obtained using xylazine (5 mg/kg IM), butorphanol (0.2 mg/kg IM), and midazolam  
66 (0.2 mg/kg IM). Anesthesia was induced with intravenous propofol to effect and 0.5-1.0 mL of  
67 2% lidocaine was topically applied to the laryngeal folds to facilitate intubation and was  
68 maintained with 1.5% inhaled isoflurane (Abbott Laboratories) in oxygen. Artificial ventilation  
69 was utilized at a rate of 8-12 breaths per minute with a tidal volume of 5-10 mL/kg. During  
70 surgery, lactated ringers solution was administered intravenously in the ear vein at a rate of 5  
71 mL/kg/hour. A Doppler probe placed on the ventral tail artery monitored heart rate continuously

72 throughout surgery, and a digital thermometer was used to check rectal temperature every 15  
73 minutes. While the pig was positioned in sternal recumbency, the head was angled 45 degrees to  
74 its left with the mouth in an open position and secured to facilitate a right sided craniectomy  
75 approach. This position utilizes gravity to pull the cerebrum away from the skull during  
76 intracranial surgery. Hair between the eye and ear was shaved and the skin was prepared in a  
77 routine manner for sterile surgery using alternating applications of Betadine and 70% alcohol.  
78 The surgical site was draped in a standard fashion.

79

80 ***Middle Cerebral Artery Occlusion (MCAO)*** As previously described <sup>1</sup>, injury was induced by  
81 performing a frontotemporal craniectomy with orbital rim osteotomy and zygomatic arch  
82 resection. A curvilinear skin incision was performed that extended from slightly above the right  
83 orbit to an area rostral to the ear canal. The temporal fascia and muscle were incised and  
84 reflected along with the skin flap. The branches of the superficial temporal artery and the  
85 associated vein were exposed and occluded using high frequency bipolar cautery forceps. Next,  
86 the insertion of the temporalis muscle was incised from below the zygomatic arch and elevated  
87 away from the parietal bone. The periosteum overlying the zygomatic arch was incised and  
88 bluntly elevated away. The zygomatic arch was partially resected, which exposed the ventral  
89 aspect of the calvaria to the level of the orbital fissure. A surgical defect was generated in the  
90 exposed calvaria using a pneumatic drill and burr and extended using Kerrison rongeurs; the  
91 lateral portion of the roof of the orbit was rongereured away while the orbital contents were  
92 protected with a hand held surgical retractor. The visible dura mater was incised and reflected  
93 dorsally as a flap. The middle cerebral artery (MCA) was located just distal to the Circle of  
94 Willis at its origin and was permanently occluded utilizing the bipolar electrocautery forceps.

95 After occlusion, the exposed portion of the brain was covered with a sterile biograft made of  
96 porcine small intestine submucosa (MatriStem, ACell). The temporalis muscle was routinely  
97 reattached and the skin was routinely re-apposed. Analgesia (Banamine<sup>®</sup>, 2 mg/kg IM) and  
98 antibiotic (Naxcel<sup>®</sup>, 4 mg/kg IM) was administered for 3 days postoperatively. Anesthesia was  
99 discontinued and pigs were returned to their pens upon extubation and monitored every 4 hours  
100 for the next 12 hours. Heart rate, respiratory rate, and temperature were recorded at each time  
101 point.

102

### 103 **Magnetic Resonance Imaging**

104 T1-weighted, DWI, and DWI-derived apparent diffusion coefficient (ADC) maps were analyzed  
105 using Osirix software. For brain tissue volumetric analysis, T1-weighted images were utilized to  
106 measure the areas of the ipsilateral (injured) and contralateral (normal) hemispheres. Hemisphere  
107 area and slice thickness were combined to obtain total hemisphere volume, and changes in the  
108 volume of the ipsilateral hemisphere were expressed as a percentage change relative to the  
109 contralateral hemisphere. Fractional anisotropy (FA), a measurement for white matter integrity,  
110 was calculated using DTI data in 3 different areas of the peri-infarct region while 3 comparable  
111 anatomical regions on the contralateral hemisphere were used as a control. The average change  
112 in FA at the area of the infarct was calculated relative to each respective area on the contralateral  
113 hemisphere. MRS was utilized to assess the level of selected neurometabolites in 3 separate  
114 regions in the peri-infarct area while 3 separate measurements were taken at a comparable area  
115 on the contralateral hemisphere. The integral of each peak was obtained from the magnetic  
116 resonance spectra for each neurometabolite of interest, and the change in peak integral of the  
117 ipsilateral region relative to the contralateral region was calculated. Mean transit time, time to

118 peak, and cerebral blood volume in the peri-infarct area and at a comparable region on the  
119 contralateral hemisphere were calculated from PWI. The change of cerebral perfusion was  
120 expressed as a percentage change in the ipsilateral hemisphere relative to the comparable area on  
121 the contralateral hemisphere.

122

### 123 **iNSC Transplantation**

124 Immediately prior to injection, iNSCs suspended in PBS were loaded into a glass micro-pipette  
125 syringe attached to a specialized 24 gauge needle (Hamilton Co, Reno, NV) and attached to the  
126 stereotaxic apparatus. Two separate injections of  $5.0 \times 10^6$  iNSCs or vehicle only (n=4 per  
127 treatment group) were transplanted into two sites of the peri-lesional region at a depth of 6mm,  
128 which was defined as the interface between the cortex and subcortical white matter, at a rate of 2  
129  $\mu\text{L}/\text{minute}$  to prevent backflow. The location of the peri-lesional region was determined by 24hr  
130 post-stroke MRI scans of each animal. After transplantation was complete, the needle was  
131 retracted at a rate of 1 mm/minute to prevent backflow. Anesthesia was discontinued and the pigs  
132 were returned to their pens upon extubation.

133

### 134 **Brain Tissue Collection and Processing**

135 For iNSC transplantation analysis, brain sections were imaged using an IVIS Lumina II System  
136 (PerkinElmer, Waltham, MA). DiR fluorescence was visualized using an excitation wavelength  
137 of 745 nm and emission wavelength set to Indocyanine Green filter. Tissue areas of high DiR  
138 fluorescence were collected, fixed in 4% PFA (Electron Microscopy Sciences), cryoprotected in  
139 30% sucrose, embedded in Tissue-Tek OCT compound (Sakura), and stored at  $-80^\circ\text{C}$ . For gene  
140 expression, brain tissue samples were collected from the peri-lesion area, dissected to separate

141 gray and white matter, snap frozen in liquid nitrogen, and stored at -80°C. For tissue  
142 immunohistochemical analysis, whole representative sections at the level of the infarct were  
143 immersed in 10% buffered formalin.

144

#### 145 **Immunofluorescence of iNSC Transplantation Sites**

146 After rehydration with PBS, tissues were blocked in 10% normal donkey serum and 0.3% Triton  
147 X-100 for one hour. Primary and secondary antibodies were diluted in PBS with 1% normal  
148 donkey serum and 0.3% Triton X-100. Primary antibodies were incubated overnight at 4°C and  
149 were detected using a species-specific fluorescently conjugated secondary antibody by Alexa  
150 Fluor (Invitrogen; 1:1000 for HNA, NeuN, and Olig2, 1:500 for GFAP) which was incubated for  
151 one hour at room temperature. Slides were mounted in Prolong Gold with DAPI (Invitrogen) and  
152 allowed to dry overnight before microscopic inspection. Imaging was performed on a IX81  
153 microscope with Disc-Spinning Unit (Olympus, Inc.) utilizing the Z-stack capabilities of Slide  
154 Book Software (Intellegent Imaging Innovations). Quantification was performed by imaging 5  
155 random fields for each animal and antibody and utilizing the cell counter plugin on ImageJ 2.0  
156 software<sup>2</sup>.

157

#### 158 **Immunohistochemistry of Endogenous Tissues**

159 Heat induced antigen retrieval was performed for all antibodies using citrate buffer at pH6  
160 (DAKO). Detection was performed utilizing biotinylated antibodies and a streptavidin label  
161 (4plus Streptavidin HRP, Biocare). A HRP label and DAB chromagen (DAKO) was used and all  
162 sections were lightly counterstained with hematoxylin. Microscopic inspection and imaging was  
163 performed on a Nikon Eclipse TE300 inverted microscope. All quantification was carried out on

164 ImageJ 2.0 software. For NeuN, GFAP, and Iba1, images were taken at the lesion border ranging  
165 from the ectomarginal gyrus to the piriform lobe. For quantification of NeuN, positive cells were  
166 manually counted using the cell counter plugin on ImageJ 2.0 and expressed as cells/mm<sup>2</sup>. For  
167 semi-quantitative analysis of GFAP and Iba1, the total area of immunoreactivity corresponding  
168 to increased optical density was determined by ImageJ software. For DCX, as described in  
169 previous studies <sup>3</sup>, DCX+ neuroblasts in three separate anatomical regions were analyzed at the  
170 level of the caudate nucleus: 1) the neuroblasts positioned directly adjacent to the ependymal  
171 cells lining the the lateral ventricle (ventricular subventricular zone; vSVZ), 2) the neuroblasts  
172 organized laterally into chains adjacent to but distinct from the vSVZ (abventricular SVZ;  
173 aSVZ), and 3) the neuroblasts that have migrated laterally to the lesion border. DCX+ cells were  
174 manually counted using the cell counter plugin on ImageJ and expressed as cells/mm<sup>2</sup>.

175

## 176 **Gene Expression**

177 Brain tissue samples allocated for gene expression analysis were weighed, and approximately  
178 150mg of tissue was transferred to cold RNAlater-ICE (Thermo Fisher Scientific) and allowed to  
179 thaw overnight at -20°C. Total RNA was extracted using an RNeasy mini kit (Qiagen) according  
180 to the manufacturer's protocol. The quality and quantity of the isolated RNA was measured on a  
181 NanoDrop 8000 (Thermo Fisher Scientific). Nine hundred nanograms of RNA from each sample  
182 was used for reverse transcription using the High Capacity cDNA Reverse Transcription Kit  
183 (Thermo Fisher Scientific) according to the manufacturer's instructions. Quantitative PCR was  
184 performed using a customized TaqMan Array Card (Thermo Fisher Scientific) on an Applied  
185 Biosystems 7900HT Real-Time PCR System (Thermo Fisher Scientific) using SDS v2.4  
186 software. Data was processed using ExpressionSuite Software v1.0.3 to obtain C<sub>T</sub> values.  $\Delta\Delta C_T$

187 and Relative Quantification values were calculated manually using *Sus scrofa*-specific GAPDH  
188 as a housekeeping control, and data was expressed as a fold change in iNSC treated samples  
189 relative to non-treated samples.

190  
191  
192  
193  
194  
195  
196  
197

### 198 **Supplementary References**

199

- 200 1 Platt, S. R. *et al.* Development and characterization of a Yucatan miniature biomedical  
201 Pig permanent middle cerebral artery occlusion stroke model. *Experimental &*  
202 *translational stroke medicine* **6**, 5, doi:10.1186/2040-7378-6-5 (2014).
- 203 2 Schneider, C. A., Rasband, W. S. & Eliceiri, K. W. NIH Image to ImageJ: 25 years of  
204 image analysis. *Nat Methods* **9**, 671-675 (2012).
- 205 3 Costine, B. A. *et al.* The subventricular zone in the immature piglet brain: anatomy and  
206 exodus of neuroblasts into white matter after traumatic brain injury. *Developmental*  
207 *neuroscience* **37**, 115-130, doi:10.1159/000369091 (2015).
- 208
